# Supplementary material for: Context dependency, co-introductions, novel mutualisms, and host shifts shaped the ectomycorrhizal fungal communities of the alien tree Eucalyptus globulus
Source: PubMed Central journal article supplement (PMC6509251; doi:10.1038/s41598-019-42550-x), 2019-05-09
Supplement: 41598_2019_42550_MOESM1_ESM.pdf [file 41598_2019_42550_MOESM1_ESM.pdf]

Authors: Serena Santolamazza-Carbone, Mónica Durán-Otero, María Calviño Cancela

Title: Context dependency, co-introductions, novel mutualisms, and host shifts shaped the ectomycorrhizal fungal communities of the alien tree *Eucalyptus globulus*

Journal: Scientific Reports

**Supplementary Table S1.** Soil parameters (mean  $\pm$  SD) of the four habitats after pooling data from the three experimental sites. Three soil samples per locality and habitat were collected. CEC = Cation Exchange Capacity. P-values = results of one-way ANOVA of difference between habitats. Significance was declared at  $P < 0.05$ . Letters in bold show the existence of a significant difference. LSD = Fisher's test Least Significant Difference.

|                       | <i>Eucalyptus</i> plantation | <i>Pinus</i> plantation    | <i>Quercus</i> forest    | Shrubland                 | P-values | LSD   |
|-----------------------|------------------------------|----------------------------|--------------------------|---------------------------|----------|-------|
| pH (H <sub>2</sub> O) | 4.47 $\pm$ 0.05              | 4.56 $\pm$ 0.04            | 4.60 $\pm$ 0.11          | 4.64 $\pm$ 0.17           | 0.681    | 0.343 |
| Organic matter (%)    | 14.31 $\pm$ 2.92             | 15.67 $\pm$ 0.48           | 17.08 $\pm$ 1.97         | 10.17 $\pm$ 2.42          | 0.204    | 7.01  |
| Organic C (%)         | 8.30 $\pm$ 1.69              | 9.09 $\pm$ 0.28            | 9.91 $\pm$ 1.15          | 5.90 $\pm$ 1.40           | 0.204    | 4.068 |
| Available P (ppm)     | 9.56 $\pm$ 0.40              | 7.78 $\pm$ 2.15            | 12.22 $\pm$ 3.72         | 6.78 $\pm$ 0.78           | 0.375    | 7.15  |
| Available K (ppm)     | 80 $\pm$ 9.17 <b>b</b>       | 63.70 $\pm$ 11.41 <b>b</b> | 134 $\pm$ 15.10 <b>a</b> | 46.22 $\pm$ 9.77 <b>b</b> | 0.004    | 37.81 |
| Available Mg (ppm)    | 37.33 $\pm$ 8.72             | 33.56 $\pm$ 15.48          | 78.22 $\pm$ 26.61        | 17.78 $\pm$ 5.79          | 0.132    | 53.02 |
| N (%)                 | 0.48 $\pm$ 0.15              | 0.52 $\pm$ 0.06            | 0.63 $\pm$ 0.09          | 0.35 $\pm$ 0.08           | 0.341    | 0.327 |
| C/N                   | 18 $\pm$ 1.53                | 18.67 $\pm$ 1.33           | 16 $\pm$ 0.58            | 16.33 $\pm$ 1.33          | 0.416    | 4.067 |
| Ca (cmol/kg)          | 0.12 $\pm$ 0.02 <b>c</b>     | 0.20 $\pm$ 0.08 <b>b</b>   | 0.58 $\pm$ 0.12 <b>a</b> | 0.24 $\pm$ 0.12 <b>b</b>  | 0.038    | 0.306 |
| K (cmol/kg)           | 0.20 $\pm$ 0.02 <b>b</b>     | 0.16 $\pm$ 0.03 <b>b</b>   | 0.34 $\pm$ 0.04 <b>a</b> | 0.12 $\pm$ 0.02 <b>b</b>  | 0.004    | 0.095 |
| Mg (cmol/kg)          | 0.30 $\pm$ 0.07              | 0.27 $\pm$ 0.12            | 0.63 $\pm$ 0.21          | 0.14 $\pm$ 0.05           | 0.132    | 0.424 |
| Na (cmol/kg)          | 0.18 $\pm$ 0.03              | 0.17 $\pm$ 0.01            | 0.17 $\pm$ 0.03          | 0.07 $\pm$ 0.03           | 0.076    | 0.088 |
| Al (cmol/kg)          | 6.18 $\pm$ 0.79              | 5.77 $\pm$ 0.29            | 6.03 $\pm$ 0.42          | 3.90 $\pm$ 0.81           | 0.099    | 2.018 |
| CEC                   | 6.98 $\pm$ 0.92              | 6.58 $\pm$ 0.14            | 7.74 $\pm$ 0.69          | 4.47 $\pm$ 0.99           | 0.076    | 2.491 |
| Ca/Mg                 | 0.33 $\pm$ 0.19 <b>b</b>     | 0.74 $\pm$ 0.21 <b>b</b>   | 1 $\pm$ 0.00 <b>a</b>    | 1.67 $\pm$ 0.38 <b>a</b>  | 0.024    | 0.778 |
| K/Mg                  | 0.77 $\pm$ 0.10              | 0.92 $\pm$ 0.22            | 0.65 $\pm$ 0.18          | 0.95 $\pm$ 0.15           | 0.585    | 0.555 |

**Supplementary Table S2.** Ectomycorrhizal fungal species found in association with *Eucalyptus globulus* (E), *Pinus pinaster* (P), *Quercus robur* (Q), and *Halimium lasianthum* (H), in four habitats (*E. globulus* plantation = Ep; *P. pinaster* plantation = Pp; *Q. robur* forest = Qf; and shrubland = S). Taxonomical identity was ascertained by direct sequencing of the ITS regions and BLAST search. Names in bold indicates that this is the first time that the taxon is reported in association with *E. globulus*. Geographical distribution have been assessed by using the available literature (see for example Vellinga et al. 2009) and the records and global mapper provided by the on-line encyclopedia of life [www.discoverlife.org](http://www.discoverlife.org), the catalogue of New Zealand Fungi ([http://nzfungi.landcareresearch.co.nz/html/search\\_index.asp](http://nzfungi.landcareresearch.co.nz/html/search_index.asp)), the Atlas of Living Australia website (<http://www.ala.org.au/blogs-news/fungimap-putting-australian-fungi-on-the-map/>), and the Global Biodiversity Information Facility web ([www.gbif.org](http://www.gbif.org)). Abbreviations in geographical distributions read as follows: Nea = Neartic region (North America, Greenland, Central Florida, highland of Mexico); Neo = Neotropical region (South Florida, lowlands of Mexico, Central America, South America, Caribbean islands); Pal = Palearctic region (Europe, North Africa, North Asia, northern and central parts of the Arabian peninsula); Afr = Afrotropical region (Africa South of the Sahara, Madagascar and the southwestern area of the Arabian peninsula); Hi = Hindomalayan region (South and Southeast Asia and southern parts of East Asia); Aus = Australasian region (Australia, New Guinea, New Zealand, New Caledonia, Tasmania, Pacific island groups). Aus\* = taxon present in the Australasian region but not in the native range of *E. globulus*.

Association motif refers only to those species associated to *Eucalyptus globulus* according to Dickie et al. (2017). The term novel indicates the association between *E. globulus* and those ECM species which are not spread in the native range of this eucalypt (i.e. South-Eastern Australia, including Tasmania). Novel/familiar refers to the association with ECM species native in NW Spain, which status (as native or recently introduced) in the *E. globulus* native range is still uncertain because they have very few and recent records. The term co-introduction refers to those ECM species native in the Australian continent but alien in Europe, which were presumably co-introduced in NW Spain with *E. globulus*.

Non-ECM fungi were also identified, but were excluded from further analyses. They were the litter decomposers *Mycena zephrus* (Basidiomycota, Mycenaceae) and *Hypholoma fasciculare* (Basidiomycota, Strophariaceae), the ericoid mycorrhizae *Meliniomyces bicolor* (Ascomycota, Leotiomyces) and *Rhizoscyphus* sp. (Ascomycota, Leotiomyces), the saprobic *Coltricia* sp. (Basidiomycota, Hymenochaetaceae), the soil fungus *Trichosporon porosum* (Basidiomycota, Trichosporonaceae), and the opportunistic, non-mycorrhizal fungus *Xenasmattella* sp. (Basidiomycota, Xenasmataceae). Also, some uncultured Helotiales (Ascomycota), reported as secondary colonists of ECM root tips (Tedersoo et al. 2009), were found in *P. pinaster* and *E. globulus* samples. The ericoids *M. bicolor* and *Rhizoscyphus* have been found in a *Q. robur* forest patch, coming from *Q. robur* and *E. globulus* roots. Recently, ericoid mycorrhizal fungi have been described in association with *Q. ilex*, however, the possibility that some sharing may occur between ericaceous plants and ECM trees is still under debate (Bergero et al. 2000).

| Identification (Blast search)                                    | Similarity (%) | Size (bp) | Habitat, host plant                                                          | Genbank accession | Geographic distribution      | Association motif with <i>E. globulus</i> |
|------------------------------------------------------------------|----------------|-----------|------------------------------------------------------------------------------|-------------------|------------------------------|-------------------------------------------|
| <i>Amanita citrina</i> (JN235140)                                | 98             | 857       | Qf, Q<br>Qf, E                                                               | KY587527          | Nea, Neo, Pal, Afr, Hi, Aus  | Putative novel                            |
| <i>Amanita muscaria</i> (JF899546)                               | 99             | 588       | Pp, P                                                                        | KY587526          | Nea, Neo, Pal, Hi, Aus       | Not associated with <i>E. globulus</i>    |
| <i>Amanita</i> sp.<br>( <i>A. gemmata</i> HQ604824) <sup>1</sup> | 94             | 760       | Ep, P<br>Pp, E<br>Pp, P                                                      | KY596001          | Nea, Neo, Pal, Afr, Hi, Aus* | Novel <sup>2</sup>                        |
| <i>Amanita rubescens</i> (AJ889923)                              | 99             | 789       | Ep, Q<br>Ep, P<br>Pp, P                                                      | KY595996          | Nea, Pal, Aus                | Not associated with <i>E. globulus</i>    |
| <i>Amphinema</i> sp. (JN943925)                                  | 96             | 694       | S, H                                                                         | KY595998          | Pal, Nea, Hi, Aus            | Not associated with <i>E. globulus</i>    |
| <i>Astraeus hygrometricus</i> (FJ710188)                         | 99             | 818       | Qf, Q                                                                        | KY596000          | Nea, Neo, Pal, Afr, Hi, Aus  | Not associated with <i>E. globulus</i>    |
| Uncultured ECM fungus (FR731296)                                 | 99             | 608       | Ep, Q<br>Ep, E<br>Ep, H<br>Ep, P<br>Pp, E<br>Qf, Q<br>S, E                   | KY609918          |                              | Undetermined                              |
| <i>Byssocorticium</i> sp. (JQ888156)                             | 95             | 609       | Ep, Q<br>Qf, Q                                                               | KY611395          | Pal                          | Not associated with <i>E. globulus</i>    |
| <i>Byssocorticium atrovirens</i> (AJ889936)                      | 99             | 729       | Qf, Q<br>Qf, E                                                               | KY595993          | Nea, Pal                     | Novel                                     |
| <i>Byssocorticium caeruleum</i> (GQ162814)                       | 99             | 697       | Qf, E                                                                        | KY595997          | Pal                          | Novel                                     |
| <i>Boletus</i> sp. (FN669289)                                    | 100            | 778       | Qf, E                                                                        | KY595994          | Pal, Nea, Neo, Afr, Hi, Aus  | Undetermined <sup>3</sup>                 |
| <i>Boletus reticulatus</i> (KC422595)                            | 99             | 856       | Qf, Q                                                                        | KY595992          | Pal, Nea, Hi                 | Not associated with <i>E. globulus</i>    |
| <i>Cenococcum geophilum</i> (KC967407)                           | 99             | 496       | Qf, Q<br>Qf, E<br>Ep, E<br>Ep, P<br>Ep, Q<br>Ep, H<br>Pp, P<br>Pp, E<br>S, E | KY595999          | Nea, Neo, Pal, Afr, Hi, Aus* | Putative novel <sup>4</sup>               |
| <i>Clavulina</i> sp. (KM576341)                                  | 97             | 758       | EP, E<br>Qf, Q<br>Pp, P                                                      | KY611396          | Nea, Neo, Pal, Afr, Hi, Aus  | Undetermined <sup>3</sup>                 |
| <i>Cortinarius anomalus</i> (AY669645)                           | 99             | 492       | Qf, E<br>Pp, P                                                               | KY595995          | Nea, Neo, Pal, Hi, Aus*      | Novel <sup>5</sup>                        |
| <i>Cortinarius decipiens</i> (AJ889946)                          | 99             | 675       | Qf, Q                                                                        | KY640616          | Nea, Pal, Aus                | Not associated with <i>E. globulus</i>    |
| <i>Cortinarius diasemospermus</i> (AJ889970)                     | 99             | 689       | Qf, Q                                                                        | KY640619          | Pal                          | Not associated with <i>E. globulus</i>    |

|                                                           |     |     |                                                                             |          |                            |                                        |
|-----------------------------------------------------------|-----|-----|-----------------------------------------------------------------------------|----------|----------------------------|----------------------------------------|
| <i>Cortinarius erythrinus</i> (AY669690)                  | 98  | 706 | Pp, P                                                                       | KY659394 | Pal, Nea, Hi               | Not associated with <i>E. globulus</i> |
| <i>Cortinarius evernius</i> (HQ604723)                    | 98  | 742 | Qf, Q                                                                       | KY640618 | Nea, Pal, Aus              | Not associated with <i>E. globulus</i> |
| <i>Cortinarius hemitrichus</i> (DQ0977870)                | 99  | 640 | Qf, Q                                                                       | KY654987 | Nea, Pal, Aus              | Not associated with <i>E. globulus</i> |
| <b><i>Cortinarius parvannulatus</i></b> (AY669664)        | 98  | 707 | Qf, E                                                                       | KY640615 | Pal, Nea                   | Novel                                  |
| <i>Cortinarius saniosus</i> (DQ102672)                    | 98  | 760 | Qf, Q                                                                       | KY654986 | Nea, Pal, Aus              | Not associated with <i>E. globulus</i> |
| <i>Cortinarius semisanguineus</i> (FJ039598)              | 99  | 750 | Ep, P                                                                       | KY654955 | Nea, Neo, Pal, Hi, Aus     | Not associated with <i>E. globulus</i> |
| <i>Cortinarius sertipes</i> (AJ889969)                    | 99  | 725 | Qf, Q                                                                       | KY640617 | Nea, Pal                   | Not associated with <i>E. globulus</i> |
| <i>Descolea maculata</i> (DQ192181)                       | 99  | 770 | Qf, E<br>Ep, E<br>Ep, P<br>Ep, Q<br>Ep, H<br>Pp, P<br>Pp, E<br>S, E<br>S, H | KY654754 | Pal, Aus                   | Co-introduced                          |
| <i>Descomyces</i> sp. (JF714650)                          | 90  | 862 | Ep, E                                                                       | KY654985 | Pal, Neo, Aus              | Co-introduced                          |
| <i>Gomphidius roseus</i> (DQ534570)                       | 100 | 636 | Pp, P                                                                       | KY971616 | Pal, Hi                    | Not associated with <i>E. globulus</i> |
| <i>Inocybe</i> sp.<br>( <i>Inocybe maculata</i> AM882958) | 89  | 773 | Qf, Q                                                                       | KY655007 | Pal, Nea, Hi               | Not associated with <i>E. globulus</i> |
| <i>Inocybe praetervisa</i> (AM882720)                     | 99  | 734 | Pp, P                                                                       | KY655012 | Pal, Nea, Hi               | Not associated with <i>E. globulus</i> |
| <i>Inocybe xanthomelas</i> (FN550895)                     | 98  | 800 | Qf, Q                                                                       | KY655005 | Pal, Nea, Hi               | Not associated with <i>E. globulus</i> |
| <i>Laccaria</i> sp. (JX030275)                            | 96  | 738 | Qf, Q<br>Qf, E<br>Ep, E<br>Ep, P<br>Ep, Q<br>Pp, P<br>Pp, E<br>S, E<br>S, H | KY655006 | Pal, Nea, Neo, Afr, Hi Aus | Undetermined <sup>3</sup>              |
| <i>Laccaria amethystea</i> (AF539737)                     | 99  | 818 | Qf, Q                                                                       | KY655004 | Pal, Nea, Neo, Hi          | Not associated with <i>E. globulus</i> |
| <i>Laccaria bicolor</i> (DQ367906)                        | 98  | 759 | Ep, Q<br>S, H                                                               | KY655010 | Nea, Neo, Pal, Hi, Aus     | Not associated with <i>E. globulus</i> |
| <i>Laccaria lateritia</i> (JX270751) <sup>6</sup>         | 98  | 423 | Ep, E                                                                       | KY655011 | Pal, Neo, Hi, Aus          | Co-introduced                          |

|                                                         |     |     |                                           |          |                             |                                        |
|---------------------------------------------------------|-----|-----|-------------------------------------------|----------|-----------------------------|----------------------------------------|
| <i>Lactarius camphoratus</i> (DQ422009)                 | 98  | 747 | Qf, E                                     | KY659396 | Pal, Nea, Neo, Hi           | Novel <sup>7</sup>                     |
| <i>Lactarius hepaticus</i> (AY254881)                   | 99  | 616 | Pp, P                                     | KY659395 | Pal, Nea, Aus               | Not associated with <i>E. globulus</i> |
| <i>Lactarius luculentus</i> (FJ845419)                  | 98  | 822 | Pp, P                                     | KY659407 | Nea                         | Not associated with <i>E. globulus</i> |
| <i>Lactarius obscuratus</i> (HQ714739)                  | 98  | 791 | Pp, P                                     | KY659397 | Pal, Nea, Neo, Hi           | Not associated with <i>E. globulus</i> |
| <i>Lactarius quietus</i> (KR025623)                     | 100 | 809 | Qf, Q<br>Ep, Q                            | KY659408 | Pal, Nea, Neo, Hi, Aus      | Not associated with <i>E. globulus</i> |
| <i>Lactarius subdulcis</i> (AJ889963)                   | 98  | 817 | Qf, Q<br>Qf, E<br>Pp, P<br>S, H           | KY681468 | Pal, Nea, Neo, Hi, Aus      | Putative novel <sup>7</sup>            |
| <i>Lactarius tabidus</i> (KP783447)                     | 98  | 592 | Qf, E                                     | KY681466 | Pal, Nea                    | Novel <sup>7</sup>                     |
| <i>Paxillus involutus</i> (FR750011)                    | 99  | 873 | Qf, Q                                     | KY681467 | Pal, Nea, Neo, Hi, Aus      | Not associated with <i>E. globulus</i> |
| <i>Pseudotomentella</i> sp. (GQ267479)                  | 99  | 738 | Ep, P<br>Pp, P<br>Pp, E                   | KY681803 | Pal, Nea, Neo, Afr, Hi Aus* | Novel <sup>8</sup>                     |
| <i>Pseudotomentella tristis</i> (AJ889979)              | 99  | 724 | Ep, P<br>Pp, P                            | KY681465 | Nea, Pal, Hi                | Not associated with <i>E. globulus</i> |
| <i>Russula</i> sp. (JN129409)                           | 97  | 690 | Qf, Q<br>Qf, E<br>Pp, P<br>Ep, Q<br>Ep, P | KY694395 | Pal, Nea, Neo, Afr, Hi Aus  | Undetermined <sup>3</sup>              |
| <i>Russula amoenolens</i> (KF245510)                    | 100 | 763 | Qf, E                                     | KY681463 | Nea, Neo, Pal, Aus*         | Novel <sup>2</sup>                     |
| <i>Russula bicolor</i> (HQ604845)                       | 98  | 875 | Pp, P                                     | KY681462 | Nea, Hi                     | Not associated with <i>E. globulus</i> |
| <i>Russula drimeia</i> (AY061672)                       | 99  | 856 | Pp, P                                     | KY681464 | Nea, Pal, Aus               | Not associated with <i>E. globulus</i> |
| <i>Russula fragilis</i> (KM576547)                      | 98  | 620 | Ep, Q                                     | KY681458 | Nea, Neo, Pal, Hi, Aus      | Not associated with <i>E. globulus</i> |
| <i>Russula</i> sp.<br><i>Russula emetica</i> (AY228360) | 96  | 756 | Pp, P                                     | KY693662 | Pal, Nea, Neo, Afr, Hi Aus  | Not associated with <i>E. globulus</i> |
| <i>Russula laccata</i> (HQ604844)                       | 98  | 857 | Pp, P                                     | KY681459 | Nea, Pal, Aus               | Not associated with <i>E. globulus</i> |
| <i>Russula nigricans</i> (KC5881314)                    | 99  | 779 | Qf, Q                                     | KY681455 | Pal, Nea, Neo, Hi, Aus      | Not associated with <i>E. globulus</i> |
| <i>Russula ochroleuca</i> (AY254880)                    | 99  | 807 | Ep, Q<br>Qf, E                            | KY681456 | Nea, Pal, Hi                | Novel                                  |
| <i>Russula parazurea</i> (DQ422007)                     | 98  | 691 | Pp, P                                     | KY681457 | Nea, Neo, Pal               | Not associated with <i>E. globulus</i> |
| <i>Russula puellula</i> (JF908706)                      | 99  | 798 | Qf, Q                                     | KY693660 | Pal                         | Not associated with <i>E. globulus</i> |
| <i>Russula sardonica</i> (JQ888201)                     | 99  | 844 | Pp, P                                     | KY693646 | Nea, Neo, Pal, Afr          | Not associated with <i>E. globulus</i> |

|                                                    |     |     |                                          |          |                             |                                        |
|----------------------------------------------------|-----|-----|------------------------------------------|----------|-----------------------------|----------------------------------------|
| <i>Russula violeipes</i> (GU371290)                | 98  | 575 | Pp, P                                    | KY693648 | Nea, Pal, Hi                | Not associated with <i>E. globulus</i> |
| <i>Scleroderma citrinum</i> (HM189957)             | 99  | 783 | Ep, Q<br>Ep, P<br>Ep, H<br>S, H<br>Pp, P | KY694393 | Pal, Nea, Neo, Hi Aus       | Not associated with <i>E. globulus</i> |
| <i>Scleroderma polyrhizum</i> (EU718123)           | 98  | 700 | Qf, E<br>Ep, H                           | KY693661 | Nea, Neo, Hi, Pal, Aus*     | Novel <sup>9</sup>                     |
| <i>Sebacina</i> sp. (AB831807)                     | 99  | 584 | Pp, P                                    | KY694396 | Pal, Nea, Neo, Hi, Aus      | Not associated with <i>E. globulus</i> |
| <i>Suillus bovinus</i> (AY898623)                  | 99  | 778 | Ep, P<br>Pp, P                           | KY693685 | Pal, Nea, Neo, Hi, Aus      | Not associated with <i>E. globulus</i> |
| <i>Thelephora terrestris</i> (JQ711981)            | 99  | 748 | Ep, Q<br>Ep, H<br>Pp, P<br>S, H          | KY693686 | Pal, Nea, Hi, Aus, Afr      | Not associated with <i>E. globulus</i> |
| <i>Tylospora</i> sp. (KF007260)                    | 90  | 490 | Qf, E<br>Qf, Q                           | KY711370 | Pal, Nea                    | Novel <sup>10</sup>                    |
| <i>Tomentella</i> sp. (JQ888215)                   | 90  | 797 | Qf, E<br>Qf, Q                           | KY694394 | Pal, Nea, Neo, Hi, Afr, Aus | Undetermined <sup>3</sup>              |
| <i>Tomentella badia</i> (JQ711987)                 | 98  | 516 | Ep, Q<br>Qf, Q<br>S, H                   | KY693714 | Nea, Neo, Pal, Hi           | Not associated with <i>E. globulus</i> |
| <i>Tomentella stuposa</i> (AY635168) <sup>12</sup> | 99  | 806 | Qf, E<br>Qf, Q<br>Ep, Q                  | KY693712 | Pal, Nea, Neo, Hi, Afr, Aus | Putative novel <sup>11</sup>           |
| <i>Tomentella sublilacina</i> (KP783476)           | 98  | 748 | Qf, E<br>Qf, Q<br>Ep, Q                  | KY693713 | Pal, Nea, Neo, Afr, Aus     | Putative novel <sup>11</sup>           |
| <i>Tomentellopsis submollis</i> (AY641459)         | 98  | 856 | Ep, H<br>S, H<br>Pp, P<br>Ep, P          | KY693726 | Pal, Nea                    | Not associated with <i>E. globulus</i> |
| <i>Xerocomus badius</i> (HQ207696)                 | 99  | 679 | Qf, E<br>Pp, P<br>Ep, P                  | KY693727 | Pal, Nea, Neo, Hi           | Novel                                  |
| <i>Xerocomus chrysenteron</i> (HQ207694)           | 98  | 836 | Qf, Q                                    | KY693968 | Nea, Neo, Pal, Hi, Aus      | Not associated with <i>E. globulus</i> |
| <i>Xerocomus rubellus</i> (JQ685725)               | 98  | 924 | Qf, Q                                    | KY693966 | Nea, Pal, Aus               | Not associated with <i>E. globulus</i> |
| <i>Xerocomus subtomentosus</i> (DQ066365)          | 100 | 677 | Qf, Q                                    | KY693967 | Nea, Neo, Pal, Hi, Aus      | Not associated with <i>E. globulus</i> |

1Sequence similarity to *Amanita gemmata* was high (94%) but did not reach the 98% threshold for species identification.

2*Amanita gemmata* has been recorded in the Australasian region, but only in New Zealand, where *E. globulus* is an exotic species (Whiters, 2001). For this reason, its association with *E. globulus* was classified as novel.

3This genus has numerous observations in both Europe and Australia (see at [www.gbif.org](http://www.gbif.org)), making it difficult to determine their native region and thus the type of interaction it establishes with *E. globulus*.

4*Cenococcum geophilum* is a cosmopolitan ECM fungus in the Holarctic realm (see at [www.gbif.org](http://www.gbif.org)) with a high adaptability to different habitats and host plants (Lo Buglio et al. 1996). Trappe (1962) showed the presence of *C. graniforme*, synonym of *C. geophilum*, mainly in the Northern Hemisphere. He also mentions the first discovery of the species in the Southern Hemisphere, in South Africa, in Stellenbosch. In regard to Australia, however, Trappe (1962) explicitly states that the species had not been encountered in Australia or New Zealand by researchers working with mycorrhizae. This leads us to conclude that recent citations of the species in Australia (Tedersoo et al. 2008, see also <http://www.ala.org.au/blogs-news/fungimap-putting-australian-fungi-on-the-map/>) probably correspond to new introductions there. For this reason, the association between this species and *E. globulus* was classified as putative novel.

5*Cortinarius anomalus* has one record in Australia, but in the western region, where *E. globulus* is not native. For this reason, its association with *E. globulus* was classified as novel.

6*Laccaria lateritia* is sometimes synonymized with *L. fraterna*, see at [www.mycobank.org](http://www.mycobank.org).

7Despite the genus *Lactarius* was generally considered not compatible with eucalypt roots in pure culture synthesis (Malajczuk et al. 1982) it was found under *Eucalyptus* spp. in the field in Tasmania (Tedersoo et al. 2008; Gates et al. 2011a; Gates et al. 2011b; Horton et al. 2013). In the present study we detected three species never described before in association with *E. globulus*.

8There are very few and recent observations of *Pseudotomentella* sp. in Australia, but not in the native area of *E. globulus*.

9*Scleroderma polyrhizum* has been considered native to the Northern Hemisphere by Vellinga et al. (2009), despite it has been frequently recorded in NE Australia, outside the native range of *E. globulus*. For this reason, its association with *E. globulus* was classified as novel.

10*Tylospora* sp. has no records in Australia, for this reason it was classified as novel.

11The *Tomentella* genus is a common member of the fungal community, although little information exists on its host specificity. This genus is present in Australia with *T. brunneorufa* Larsen (Kirk et al. 2010; Agerer & Bougher, 2001), and in Tasmania with several species (Tedersoo et al. 2008), in association with *Eucalyptus*.

12*Tomentella stuposa* was detected in Tasmania by Tedersoo et al. (2008) in a forest dominated by *E. regnans*. This is the first time on our knowledge that this species is reported in association with *E. globulus*.

## References

- Agerer R. & Bougher N.L. *Tomentella brunneorufa* M. J. Larsen + *Eucalyptus* spec. *Descr. Ectomyc.* 5: 205-212 (2001).
- Bergero, R., Perotto, S., Girlanda, M., Vidano, G. & Luppi, A. M. Ericoid mycorrhizal fungi are common root associates of a Mediterranean ectomycorrhizal plant (*Quercus ilex*). *Mol. Ecol.* 9: 1639–1649 (2000).
- Dickie, I. A. *et al.* The emerging science of linked plant-fungal invasions. *New Phytol* 215:1314-1332 (2017).
- Gates, G.M., Mohammed, C., Ratkowsky, D., Wardlaw, T. & Davidson N.J. Diversity and ecology of epigeous ectomycorrhizal macrofungal assemblages in a native wet eucalypt forest in Tasmania, Australia. *Fungal Ecol.* 4: 290-298. (2001a)
- Gates, G.M., Mohammed, C., Wardlaw, T, Davidson N.J. & Ratkowsky, D.A. Diversity and phenology of the macrofungal assemblages supported by litter in a tall, wet *Eucalyptus obliqua* forest in southern Tasmania, Australia. *Fungal Ecol.* 4: 68-75 (2011b).

Horton, B.M., Glen, M., Davidson, N.J., Ratkowsky, D., Close D.C., Wardlaw, T.J., & Mohammed, C. Temperate eucalypt forest decline is linked to altered ectomycorrhizal communities mediated by soil chemistry. *Forest Ecol. Manag.* 302: 329-337 (2013).

Kirk P.M., Cannon, P. F., Minter, D. W. & Stalpers, J. A. 2010. Dictionary of the Fungi (10th ed.). Wallingford, UK: CAB International. p. 201

Lo Buglio, K.F., Berbee, M.L., Taylor, J. W. Phylogenetic origins of the asexual mycorrhizal symbiont *Cenococcum geophilum* Fr. and other mycorrhizal fungi among the Ascomycetes. *Molecular Phylogenetics and Evolution* 6: 287-294 (1996).

Malajczuk, N., Molina, R. & Trappe, J.M. Ectomycorrhiza formation in *Eucalyptus*. I. Pure culture synthesis, host specificity and mycorrhizal compatibility with *Pinus radiata*. *New Phytol.* 91:67-482 (1982).

Tedersoo L., et al. Ascomycetes associated with ectomycorrhizas: molecular diversity and ecology with particular reference to the Helotiales. *Environ. Microbiol.* 11: 3166-3178 (2009).

Tedersoo, L., Jairus, T., Horton, B.M., Abarenkov, K., Suvi, T., Saar, I., Koljalg, U. Strong host preference of ectomycorrhizal fungi in a Tasmanian wet sclerophyll forest as revealed by DNA barcoding and taxon-specific primers. *New Phytol.* 180, 479-490 (2008).

Trappe, J. M. “*Cenococcum graniforme*—Its Distribution, Ecology, Mycorrhiza and Inherent Variation,” Ph.D. Dissertation, University of Washington, Seattle, WA. (1962).

Vellinga, E. C., Wolfe, B. E. & Pringle, A. Global patterns of ectomycorrhizal introductions. *New Phytol.* 181: 960-973 (2009).

Withers, T. M. Colonization of eucalypts in New Zealand by Australian insects. *Austral Ecol.* 26: 467-476 (2001).



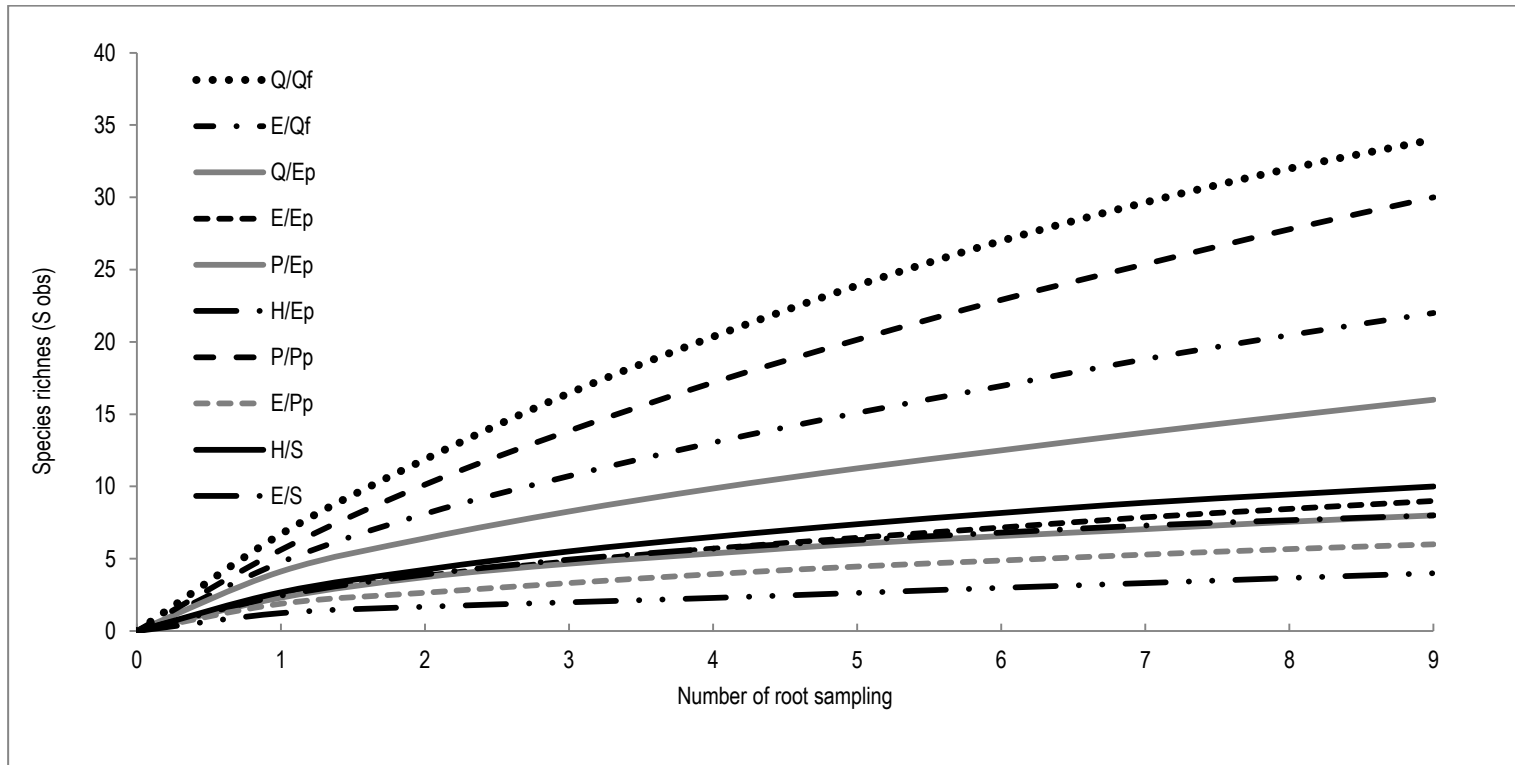

**Supplementary Figure S1.** Rarefied species accumulation curves of four plant species recorded in four types of habitat (beta diversity). Each curve represents the mean of 500 randomizations of sampling order. *Eucalyptus globulus* (E), *Pinus pinaster* (P), *Quercus robur* (Q) and *Halimium lasianthum* (H) in four habitats (*E. globulus* plantation = Ep; *P. pinaster* plantation = Pp; *Q. robur* forest = Qf; and shrubland = S).

**Supplementary Table S3.** Observed ( $S_{obs}$ ) and estimated ( $S_{est}$ , with the Chao2 method) species richness and the ratio between them. Abbreviations as per figure S1.

|                   | Q/Qf  | P/Pp  | E/Qf  | Q/Ep  | H/S   | E/Ep  | H/Ep  | P/Ep  | E/Pp  | E/S   |
|-------------------|-------|-------|-------|-------|-------|-------|-------|-------|-------|-------|
| $S_{obs}$         | 34    | 30    | 22    | 16    | 10    | 9     | 8     | 8     | 6     | 4     |
| $S_{est}$         | 46    | 59.63 | 43.78 | 38.22 | 10    | 14.56 | 10    | 15.11 | 10    | 6.67  |
| $S_{est}/S_{obs}$ | 0.739 | 0.503 | 0.503 | 0.419 | 1.000 | 0.618 | 0.800 | 0.529 | 0.600 | 0.600 |

**Supplementary Table S4.** Results of the PERMANOVA analysis to test for differences in ECM fungal taxa composition between host plant species within habitats (all the studied combinations of plant species in each habitat).

| Source                       | df | SS         | MS     | Pseudo-F | P (perm) |
|------------------------------|----|------------|--------|----------|----------|
| Site                         | 2  | 5363.9     | 2681.9 | 1.0951   | 0.3282   |
| Plant species/Habitat        | 9  | 1.3349E+05 | 14833  | 5.509    | 0.0001   |
| Site x Plant species/Habitat | 18 | 48464      | 2692.4 | 1.0994   | 0.1652   |
| Res                          | 60 | 1.4694E+05 | 2448.9 |          | 60       |
| Total                        | 89 | 3.3426E+05 |        | Total    | 89       |

**Supplementary Table S5.** Pairwise comparisons between host plant species within habitats in ECM fungal taxa composition. Average percentage similarities and significance of the difference between cases are shown in each cell, with P values symbolized as \* for  $P \leq 0.05$ , \*\* for  $P \leq 0.01$ , \*\*\* for  $P \leq 0.001$  and ns for non-significant differences. *Eucalyptus globulus* (E), *Pinus pinaster* (P), *Quercus robur* (Q) and *Halimium lasianthum* (H) in four habitats (*E. globulus* plantation = Ep; *P. pinaster* plantation = Pp; *Q. robur* forest = Qf; and shrubland = S).

| Host plant/Habitat | Q/Qf        | E/Qf      | Q/Ep     | E/Ep      | H/Ep      | P/Ep     | E/S       | H/S      | E/Pp      | P/Pp   |
|--------------------|-------------|-----------|----------|-----------|-----------|----------|-----------|----------|-----------|--------|
| Q/Qf               | 35,152      |           |          |           |           |          |           |          |           |        |
| E/Qf               | 23,984*     | 24,437    |          |           |           |          |           |          |           |        |
| Q/Ep               | 32,755 ns   | 25,896 ns | 34,797   |           |           |          |           |          |           |        |
| E/Ep               | 10,018**    | 23,325*   | 16,482** | 33,141    |           |          |           |          |           |        |
| H/Ep               | 0,26101**   | 14,072**  | 6,2377** | 31,862 ns | 33,002    |          |           |          |           |        |
| P/Ep               | 13,558**    | 22,746 ns | 20,231** | 24,946 ns | 18,598**  | 26,382   |           |          |           |        |
| E/S                | 7,6541E-2** | 20,389**  | 7,7648** | 40,159 ns | 42,084 ns | 23,491** | 52,813    |          |           |        |
| H/S                | 1,1576**    | 1,7586**  | 5,3216** | 2,8472**  | 6,4173**  | 1,5915** | 3,193**   | 27,006   |           |        |
| E/Pp               | 4,0292 **   | 28,804**  | 13,673** | 42,98 ns  | 37,113**  | 26,905** | 54,57 ns  | 1,6939** | 61,861    |        |
| P/Pp               | 4,5714**    | 3,9826**  | 1,7002** | 0,70488** | 0,21108** | 5,1649** | 1,57E-2** | 4,0085** | 0,44117** | 14,028 |
